# Supplementary material for: 8-channel Tx dipole and 20-channel Rx loop coil array for MRI of the cervical spinal cord at 7 Tesla
Source: PubMed Central journal article supplement — bioRxiv. 2023 Feb 9:2023.02.08.527664. Preprint. [Version 1] doi: 10.1101/2023.02.08.527664 (PMC9934596; doi:10.1101/2023.02.08.527664), 2023-02-09
Supplement: NIHPP2023.02.08.527664v1-supplement-1.pdf [file NIHPP2023.02.08.527664v1-supplement-1.pdf]

## Supporting information

### Simulated $B_1^+$ fields

The simulated coupling between adjacent transmit elements (when converted to a fraction of coupled power) matched experimental measurements to within 2 percentage points: this close agreement ensured consistency between the spatial patterns of the corresponding  $B_1^+$  distributions (**Figure 11**). The mean and 95<sup>th</sup> percentile simulated and experimental  $B_1^+$  maps of the phantom, when combined in CP mode, differed by -11.5% and 1.4%, respectively. For 10,000 random shim settings (magnitude and phase), the vast majority of solutions resulted in deviations between any combined simulated and experimental  $B_1^+$  map that ranged within +/-40% (mean and 95th percentile). However, these results included some uncertainty because the masking of the simulated and experimental maps were different.

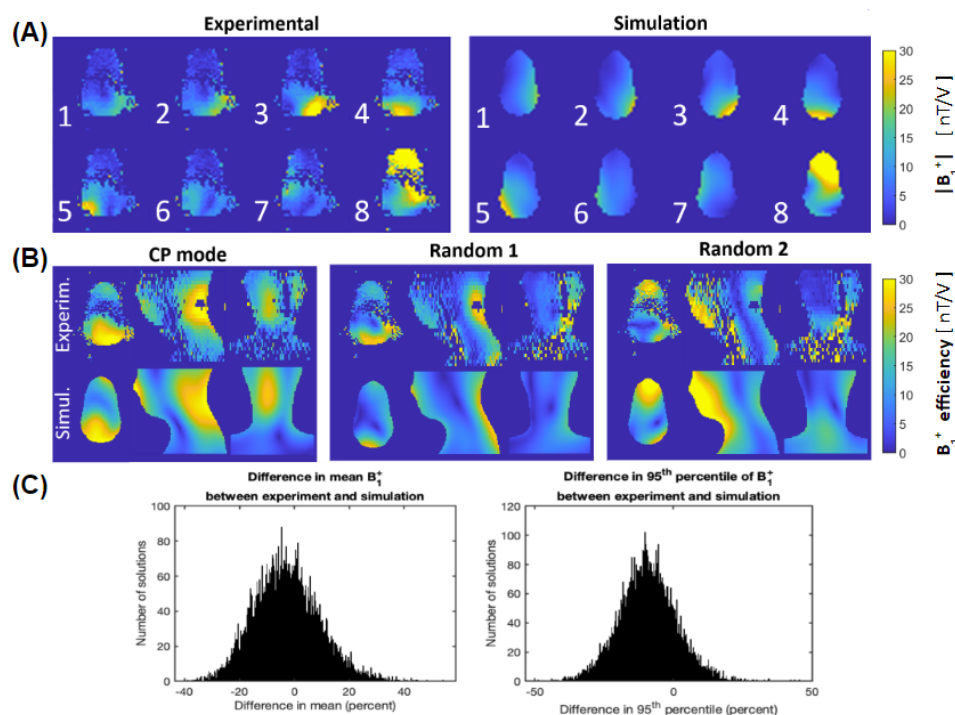

**Figure 11.** (A) A representative axial slice of  $B_1^+$  maps (of the spine phantom) from individual transmitters derived from experiment (left) and simulation (right). (B) Complex scaling factors were applied to simulated  $B_1^+$  fields to increase agreement with experimentally derived maps—resulting in a commensurate agreement when comparing  $B_1^+$  maps combined in CP mode (left) and two random shim modes (center, right). (C) When combining the eight transmit channels with 10,000 different random shim settings, histograms of the deviation between the mean and 95th percentiles of the simulated and experimental  $B_1^+$  distributions showed that most of the solutions are within +/-40%.

## Simulated $B_1^+$ shimming

$B_1^+$  shimming provides the flexibility to tailor the  $B_1^+$  field according to the requirements of the pulse sequence, whether that necessitates an improvement in transmit uniformity, efficiency, or local SAR. Individual  $B_1^+$  maps, when combined in the nominal CP mode (phase-only shim solution), produce a mean  $B_1^+$  over the spinal cord of 17.9 nT/V with a CoV of 39.8% (see **Figure 12 (A)**). When a shimming algorithm that maximizes transmit uniformity is employed, this metric is improved to 15.4% with a reduction in mean  $B_1^+$  of 69%. If the transmit efficiency is maximized, a phase and magnitude shim solution can improve the efficiency of the CP mode by 12%, with a 2.8% decrease in uniformity. Shimming solutions can be computed within the bounds of these solutions by altering the regularization of the cost function, which allows a trade-off between  $B_1^+$  efficiency, uniformity, and local SAR.

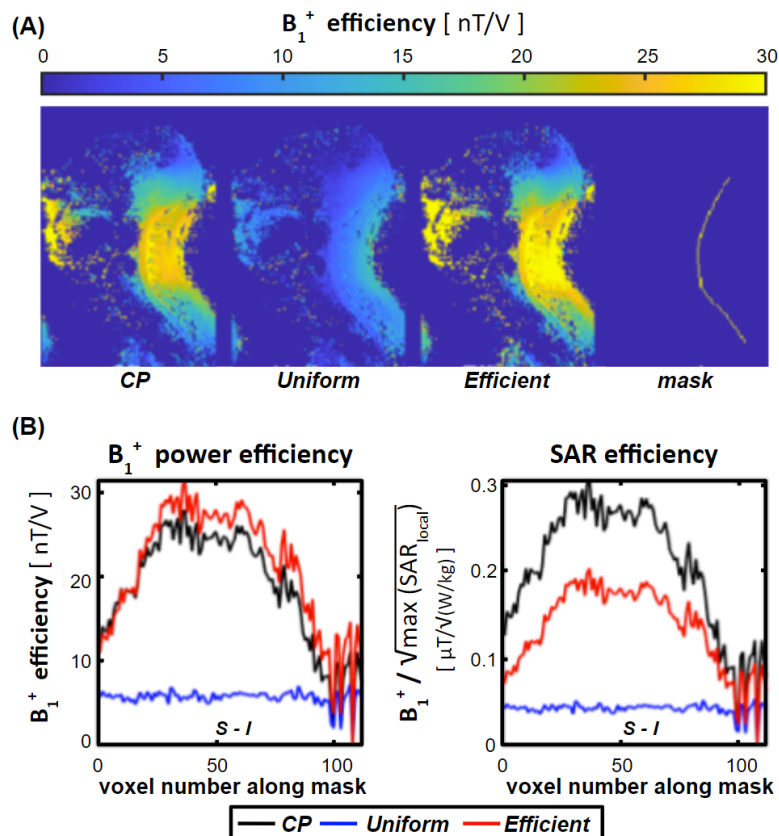

**Figure 12.** (A)  $B_1^+$  maps with transmitter shim weights set to produce: (left) the nominal CP mode (i.e., a phase-only shim that produces the highest  $B_1^+$  efficiency in the C3 vertebrae); (center) the highest  $B_1^+$  uniformity over the spinal-cord region defined by the mask; and (right) the highest  $B_1^+$  efficiency over the same region. (B) Plots of the  $B_1^+$  power efficiency and SAR efficiency for these shim solutions demonstrate the breadth of the solution space—the shimming algorithm can then be tailored to the requirements of the desired pulse.

Whereas high transmit efficiency may be required for short, high flip-angle RF pulse, the SAR efficiency of the shim solution,  $B_1^+ / \sqrt{\max(SAR_{local})}$ , is often the limitation when determining the allowable number of slices and repetition time. Power efficiency and SAR efficiency are not necessarily synonymous, as evidenced by the  $B_1^+ / \sqrt{\max(SAR_{local})}$  of the shim solutions presented in **Figure 12 (B)**, where the CP mode attained the highest  $B_1^+ / \sqrt{\max(SAR_{local})}$ , but not the highest power efficiency.
